# Supplementary material for: CCR2+ Monocyte-Derived Infiltrating Macrophages Are Required for Adverse Cardiac Remodeling During Pressure Overload
Source: PubMed Central journal article supplement — JACC Basic Transl Sci. 2018 Mar 14;3(2):230–44. doi: 10.1016/j.jacbts.2017.12.006 (PMC6059350; doi:10.1016/j.jacbts.2017.12.006), 2018-03-14
Supplement: mmc1.pdf [file mmc1.pdf]

**Supplemental Table 1. Forward (F) and Reverse (R) Primers for Real-Time PCR**

| <b>Gene Name</b> | <b>Gene ID</b> | <b>Sequence</b>                                          |
|------------------|----------------|----------------------------------------------------------|
| IL-4             | 16189          | F: GGTCTCAACCCCCAGCTAGT<br>R: CCGATGATCTCTCTCAAGTGAT     |
| IL-10            | 16153          | F: GATGCCCCAGGCAGAGAA<br>R: CACCCAGGGAATTCAAATGC         |
| TNF $\alpha$     | 21926          | F: CAGCCGATGGGTTGTACCTT<br>R: GGCAGCCTTGTCCCTTGA         |
| CCL2             | 20296          | F: GTCTGTGCTGACCCCAAGAAG<br>R: TGGTTCCGATCCAGGTTTTTA     |
| CCL7             | 20306          | F: CCACATGCTGCTATGTCAAGA<br>R: ACACCGACTACTGGTGATCCT     |
| CCL12            | 20293          | F: ATTTCCACACTTCTATGCCTCCT<br>R: ATCCAGTATGGTCCTGAAGATCA |
| ANP              | 230899         | F: GCTTCCAGGCCATATTGGAG<br>R: GGGGGCATGACCTCATCTT        |
| BNP              | 18158          | F: AAGAGAAAAGTCGGAGGAAATGG<br>R: TTTGTGAGGCCTTGGTCCTT    |
| ICAM             | 15894          | F: GTGATGCTCAGGTATCCATCCA<br>R: CACAGTTCTCAAAGCACAGCG    |
| VCAM             | 22329          | F: GCCCACTAAACGCGAAGGT<br>R: ACTGGGTAAATGTCTGGAGCC       |
| TGF $\beta$      | 21803          | F: CTCCCGTGGCTTCTAGTGC<br>R: GCCTTAGTTTGGACAGGATCTG      |
| TGF $\beta$ R1   | 21812          | F: TCTGCATTGCACTTATGCTGA<br>R: AAAGGGCGATCTAGTGATGGA     |
| TGF $\beta$ R2   | 21813          | F: TTGATTGCCAGTGCTAACCC<br>R: AACAAGCCACAGTAACATGACA     |
| Collagen I       | 12842          | F: CTTACCTACAGCACCTT<br>R: TGA CTGTCTTGCCCCAAAGT         |
| Collagen III     | 12825          | F: TTCTGCCACCCCGAACTC<br>R: TTGCAGCCTTGGTTAGGATCA        |
| Collagen IV      | 12828          | F: AGCTCTCGAACCTATATTA<br>R: TGAACAGCTATCGCCATTG         |
| Fibronectin      | 14268          | F: AGGCAGAAAACAGGTCTCGATT<br>R: TGAATGAGTTGGCGGTGATATC   |
| Vimentin         | 22352          | F: GAGAGAGGAAGCCGAAAGCA<br>R: GCCAGAGAAGCATTGTCAACAT     |
| GAPDH            | 14433          | F: CATGGCCTTCCGTGTTCTTA<br>R: GCGGCACGTCAGATCCA          |
| $\beta$ -Actin   | 11461          | F: CGATGCCCTGAGGCTCTTT<br>R: TGGATGCCACAGGATTCCA         |

## SUPPLEMENTAL FIGURE LEGENDS

### **Supplemental Figure 1. Identification of cardiac macrophages in naïve mouse**

**hearts by flow cytometry. A)** Depiction of gating strategy used to identify CD45<sup>+</sup>F4/80<sup>+</sup>MerTK<sup>+</sup> cardiac macrophages using flow cytometry, and differentiation of CCR2<sup>-</sup> resident and CCR2<sup>+</sup> infiltrating macrophage sub-populations in naïve mice. **B)** Corresponding quantitation of CD45<sup>+</sup> leukocytes, F4/80<sup>+</sup>MerTK<sup>+</sup> macrophages, and CCR2<sup>+</sup> and CCR2<sup>-</sup> macrophage subsets from mouse hearts.

### **Supplemental Figure 2. Identification of circulating monocytes by flow cytometry.**

Illustration of peripheral blood leukocyte gating strategy to identify Ly6C<sup>hi</sup>CCR2<sup>+</sup> and Ly6C<sup>low</sup> monocytes. Monocytes were pre-gated on CD45<sup>+</sup>CD11b<sup>+</sup>Ly6G<sup>-</sup> cells.

### **Supplemental Figure 3. CCR2 antagonism with RS-504393 during acute pressure overload blunts early compensatory left ventricular (LV) hypertrophy.**

LV end-diastolic volume (EDV), end-systolic volume (ESV), ejection fraction (EF), end-diastolic interventricular septum thickness (IVSd), and end-diastolic LV posterior wall thickness (LVPWd) (**A**), and aortic gradient (**B**) as measured by echocardiography and Doppler in mice treated with CCR2 antagonist or vehicle 6 d after transverse aortic constriction (TAC) or sham operation. **C)** Heart weight (HW) to tibia length (TL) ratio 1 w after TAC or sham operation. N=11-14 per group for panels A-C. **D)** LV gene expression of the hypertrophic markers atrial and B-type natriuretic peptide (ANP and BNP) 1 w post-TAC or sham operation. (n=5-6 per group). **E)** Representative cardiac wheat germ agglutinin stains and cardiomyocyte area quantitation for the same experimental groups (n=4-6 per group). Scale bar 25µm. \*p<0.01, \*\*p<0.01, \*\*\*p<0.001; \*\*\*\*p<0.0001. Statistical comparisons for ANP gene expression and cardiomyocyte area performed after logarithmic data transformation as described in text.

### **Supplemental Figure 4. Cardiac macrophage quantitation in mice treated**

**with MC21 or IgG 4 w after TAC or sham-operation.** The flow cytometry gating strategy outlined in Figure 1 was used to identify monocyte-derived infiltrating CCR2<sup>+</sup> macrophages (*Left*) and CCR2<sup>-</sup> resident macrophages (*Right*), pre-gated on F4/80<sup>+</sup>MerTK<sup>+</sup>CD64<sup>+</sup> cells. Statistical comparisons were performed using individual unpaired t-test or Mann-Whitney test (as appropriate) between the four specific experimental groups, with Bonferroni post-hoc correction as detailed in the text. A p < 0.0125 was used for statistical significance.

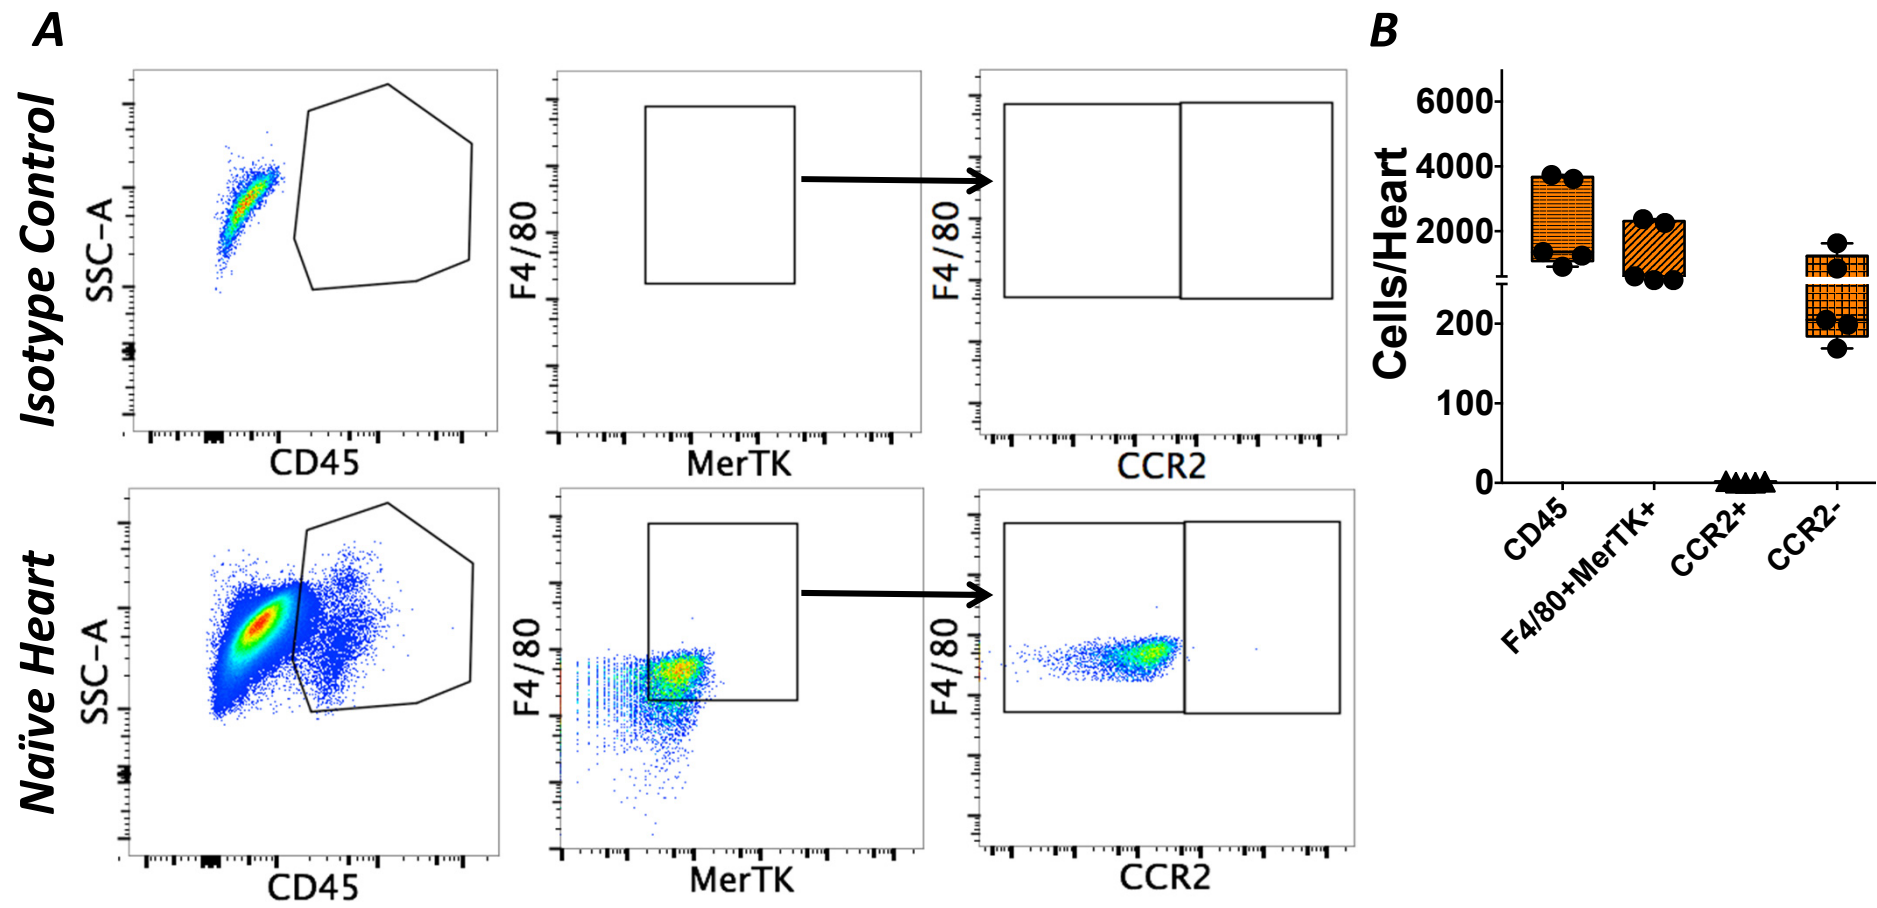

*Supplemental Figure 1*

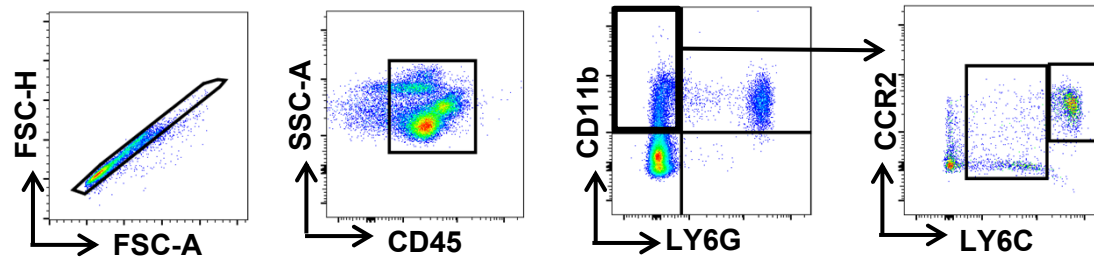

***Supplemental Figure 2***

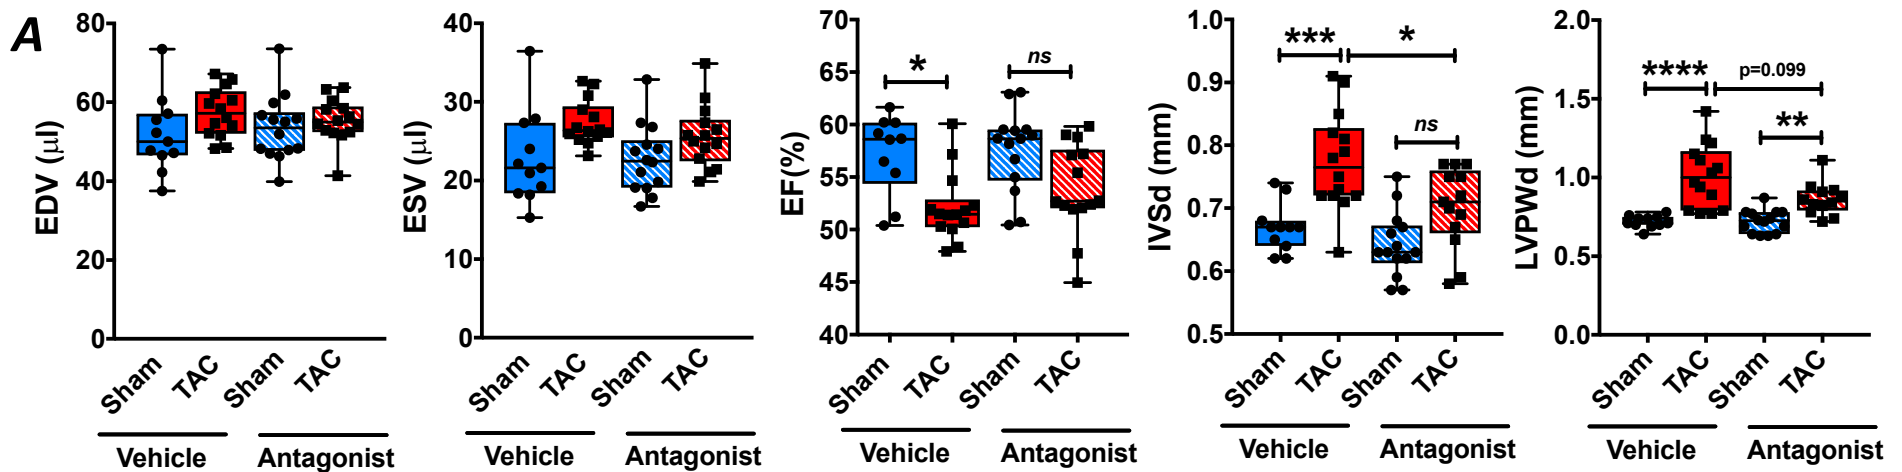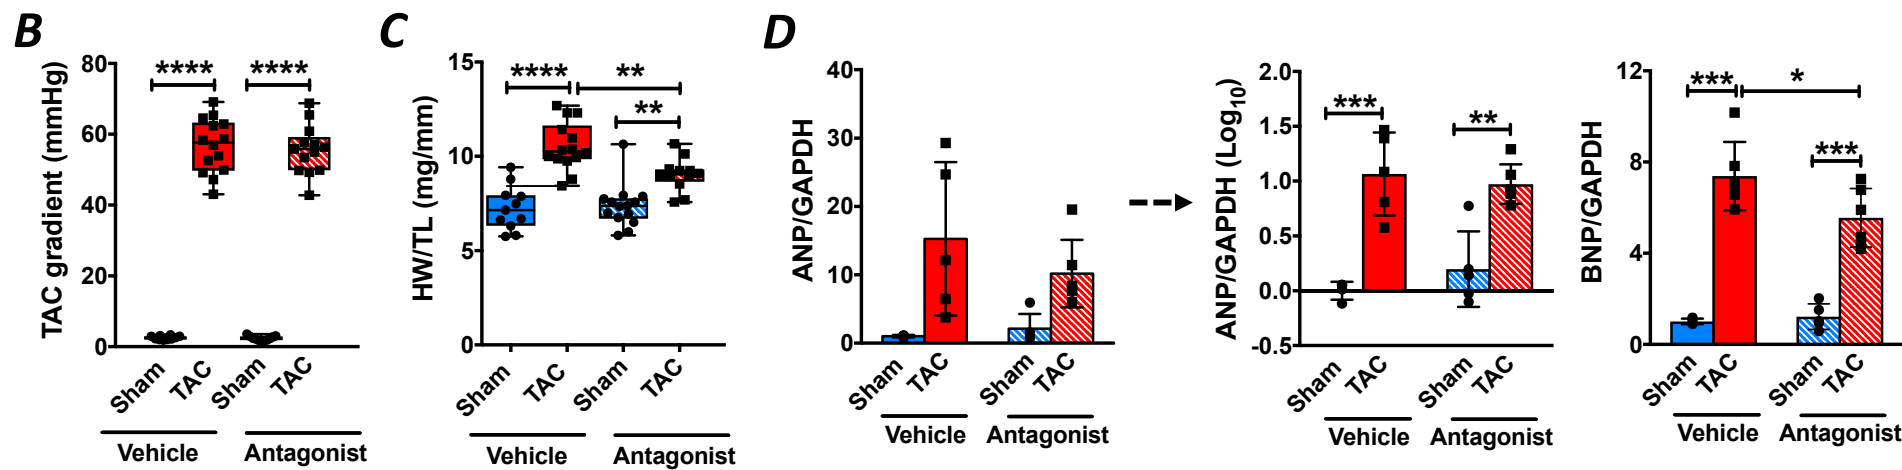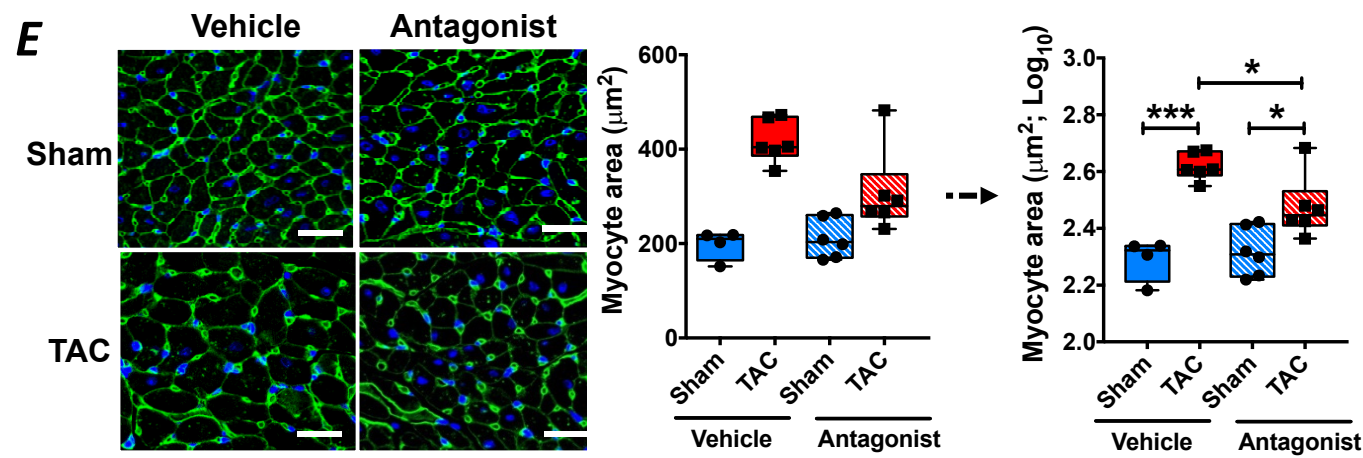

**Supplemental Figure 3**

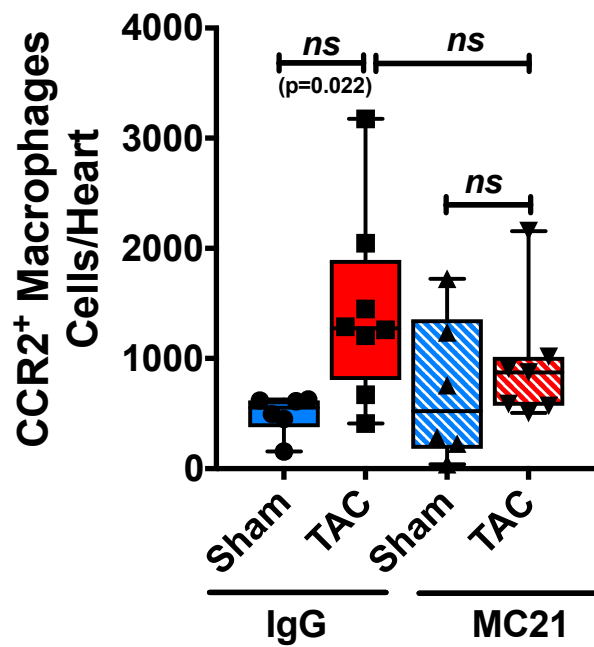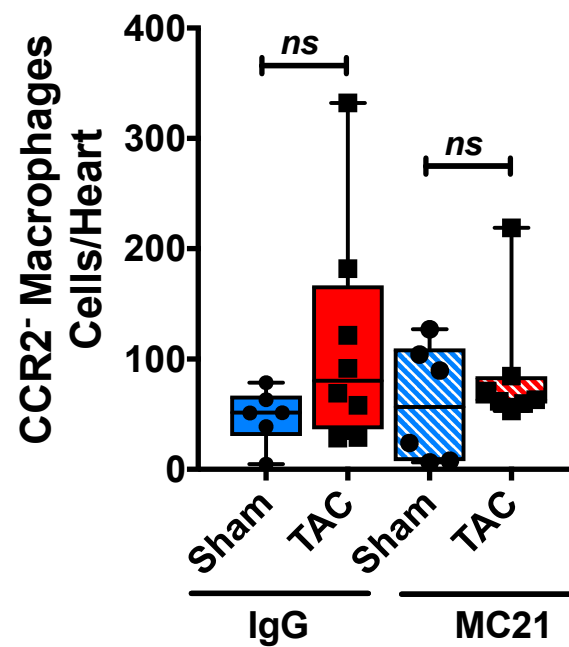

*Supplemental Figure 4*
